# Supplementary material
Source: publisher figshare collection journal article supplement (https://karger.figshare.com/ndownloader/files/12784859)
Supplement: Supplementary file 1 [file 12784859]

**Table S6.** Percentage of subjects with non-detectable values

| **Gene Symbol** | **% of subjects with non-detectable value** |
| --- | --- |
| ABCB1 | 0% |
| ADARB1 | 0% |
| AKR1D1 | 8% |
| ANGPTL4 | 0% |
| AQP1 | 0% |
| ARID5B | 0% |
| ATF4 | 0% |
| AVPR1B | 0% |
| BMPER | 0% |
| CACNA1C | 0% |
| CALCR | 0% |
| CEBPA | 0% |
| CEBPB | 0% |
| COMT | 0% |
| CREB1 | 0% |
| CREB3 | 0% |
| CREB3L4 | 0% |
| CTGF | 0% |
| CYB561 | 0% |
| CYP11A1 | 0% |
| CYP11B1 | 8% |
| CYP17A1 | 58% |
| DDIT4 | 0% |
| DIRAS2 | 42% |
| DUSP1 | 0% |
| EDN1 | 0% |
| ERRFI1 | 0% |
| FKBP5 | 0% |
| FOSL2 | 0% |
| GHRHR | 38% |
| GLUL | 0% |
| GSR | 0% |
| HAS2 | 0% |
| HSD11B1 | 0% |
| HSD11B2 | 0% |
| HSD3B1 | 0% |
| IL10 | 0% |
| IL1B | 0% |
| IL1RN | 0% |
| IL2 | 63% |
| IL6 | 0% |
| IL6R | 0% |
| KLF13 | 0% |
| KLF9 | 0% |
| LNPEP | 0% |
| LOX | 0% |
| MT2A | 0% |
| NFKBIA | 0% |
| NPY | 46% |
| NR3C1 | 0% |
| NRG1 | 33% |
| OXTR | 0% |
| PDCD7 | 0% |
| PDGFRB | 0% |
| PER1 | 0% |
| PER2 | 0% |
| PIK3R1 | 0% |
| PLD1 | 0% |
| PLEKHF1 | 0% |
| POU2F1 | 0% |
| POU2F2 | 0% |
| RASA3 | 0% |
| RHOB | 0% |
| SESN1 | 0% |
| SGK1 | 0% |
| SLC10A6 | 0% |
| SLC19A2 | 0% |
| SLC22A5 | 0% |
| SLC6A1 | 0% |
| SLC6A2 | 0% |
| SLC6A4 | 0% |
| SPHK1 | 0% |
| SPSB1 | 0% |
| STAT5A | 0% |
| STAT5B | 0% |
| TBL1XR1 | 0% |
| TNF | 0% |
| TNFAIP3 | 0% |
| TSC22D3 | 0% |
| USP2 | 0% |
| USP54 | 0% |
| VDR | 0% |
| ZFP36 | 0% |
| ZHX3 | 0% |
| ZNF281 | 0% |
